# Supplementary material
Source: Springer Nature journal article supplement (https://www.springerprofessional.de/resource/supplementary/13638_2014_1062_MOESM12_ESM.pdf/11898932)

Mobile speed of members: [5, 20]m/s

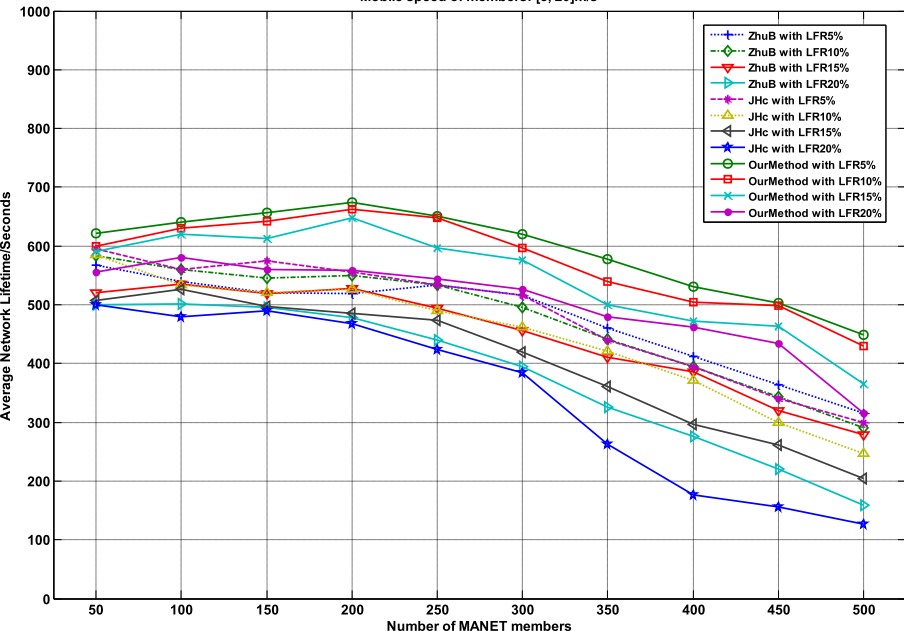

Supplement: MOESM12 [file 11898932]
